# Supplementary material for: Drivers of Resilience in Lebanese Firms
Source: Research Square preprint supplement (doi:10.21203/rs.3.rs-6573580/v1), 2025-05-06
Supplement: Supplementary file 1 [file 28684cc8f907132726d83a63.docx]

| **Appendix one** | | | | | |
| --- | --- | --- | --- | --- | --- |
| Questions | Response: Strongly Disagree/  Tout à fait en désaccord/ أعارض بشدة | Response: Disagree/ En désaccord/ أعارض | Response: Neutral/ Neutre/ محايد | Response: Agree/ D'accord/ أوافق | Response: Strongly Agree/ Tout à fait d'accord/ أوافق بشدة |
| Organizational Resilience |  |  |  |  |  |
| 1. شركتنا تقف بثبات وتحافظ على مكانتها في الأوقات الصعبة  Our company stands steady and preserves its position in challenging situations.  Notre entreprise reste stable et préserve sa position dans des situations difficiles. |  |  |  |  |  |
| 2. بارعة في إيجاد الحلول للمشاكل المستجدَة شركتنا  Our company is good at finding solutions to emergent problems.  Notre entreprise est douée pour trouver des solutions aux problèmes émergents |  |  |  |  |  |
| 3. شركتنا تتخذ الإجراءات اللازمة بسرعة عند الحاجة.  Our company rapidly takes the necessary actions when required.  Notre entreprise prend rapidement les mesures nécessaires lorsque cela est requis. |  |  |  |  |  |
| 4. شركتنا تستجيب بسرعة عند الحاجة.  Our company reacts quickly when required.  Notre entreprise réagit rapidement lorsque cela est nécessaire. |  |  |  |  |  |
| 5. شركتنا تجد طرقًا إبداعية للاستفادة حتى من المواقف السلبية.  Our company finds creative ways to benefit even from adverse situations.  Notre entreprise trouve des moyens créatifs de tirer profit même des situations défavorables. |  |  |  |  |  |
| 6. الجميع في شركتنا ملتزمون بأداء واجباتهم كما هو مطلوب.  Everyone in our company is committed to fulfilling their duties as required.  Tout le monde dans notre entreprise est engagé à remplir ses devoirs comme requis. |  |  |  |  |  |
| 7. شركتنا تعمل بشكل جيد كعائلة واحدة موحدة.  Our company works well together as a unified family.  Notre entreprise fonctionne bien ensemble comme une famille unie. |  |  |  |  |  |
| 8. شركتنا تظهر مقاومة شديدة ولا تستسلم بسهولة في الأوقات الصعبة.  Our company exhibits fierce resistance and does not surrender easily in harsh times.  Notre entreprise fait preuve de résistance acharnée et ne cède pas facilement en temps difficiles. |  |  |  |  |  |
| 9. شركتنا تستمر في التقدم وتبقى على المسار الصحيح بغض النظر عن العقبات.  Our company keeps moving forward and stays on course, regardless of the obstacles.  Notre entreprise continue d'avancer et reste sur la bonne voie, quels que soient les obstacles. |  |  |  |  |  |
| Employee Engagement |  |  |  |  |  |
| 10. في العمل، أشعر بالحيوية والنشاط.  At work, I feel full of life and energized.  Au travail, je me sens plein de vie et énergisé. |  |  |  |  |  |
| 11. أنا قادر وقوي في عملي.  I am capable and strong in my job.  Je suis capable et fort dans mon travail. |  |  |  |  |  |
| 12. أنا شغوف ومتحمس بعملي.  I am passionate and excited about my work.  Je suis passionné et enthousiaste à propos de mon travail. |  |  |  |  |  |
| 13. أجد غاية ومعنى عميقين في عملي.  I find profound purpose and meaning in my job.  Je trouve un but et un sens profond dans mon travail. |  |  |  |  |  |
| 14. أنغمس تمامًا في عملي.  I get totally absorbed in my job.  Je suis complètement absorbé par mon travail. |  |  |  |  |  |
| 15. الوقت يمر بسرعة عندما أعمل.  Time passes quickly when I am working.  Le temps passe vite quand je travaille. |  |  |  |  |  |
| Employee Commitment |  |  |  |  |  |
| 16. أنا مستعد لبذل جهود كبيرة للمساعدة في نجاح المنظمة.  I am willing to exert substantial effort to help the organization's success.  Je suis prêt à fournir des efforts considérables pour aider au succès de l'organisation. |  |  |  |  |  |
| 17. أخبر أصدقائي في المجتمع أن هذه الشركة مكان رائع للعمل.  I tell my social network that this firm is an amazing place to work.  Je dis à mon réseau social que cette entreprise est un endroit incroyable pour travailler. |  |  |  |  |  |
| 18. لدي شعور عميق بالولاء لهذه الشركة.  I have a deep sense of loyalty to this firm.  J'ai un profond sentiment de loyauté envers cette entreprise. |  |  |  |  |  |
| 19. قِيَمي وقِيَم المنظمة متوافقة.  My values and the organization’s values are aligned.  Mes valeurs et celles de l'organisation sont alignées. |  |  |  |  |  |
| 20. أخبر الآخرين بفخر أنني أعمل لهذه المنظمة.  I proudly tell others that I work for this organization.  Je dis fièrement aux autres que je travaille pour cette organisation. |  |  |  |  |  |
| Perceived Organizational Support |  |  |  |  |  |
| 21. أعتقد أن الشركة تأخذ قيمِي وتطلعاتي على محمل الجد.  I believe the company takes my values and aspirations seriously.  Je crois que l'entreprise prend mes valeurs et mes aspirations au sérieux. |  |  |  |  |  |
| 22. أشعر أن مساهماتي مُقدّرة في هذه الشركة.  I feel that my contributions are valued in this company.  Je sens que mes contributions sont valorisées dans cette entreprise. |  |  |  |  |  |
| 23. عندما أواجه مشكلة في العمل، يمكنني الاعتماد على الشركة للمساعدة.  When I face a problem at work, I can count on the organization for help.  Lorsque je rencontre un problème au travail, je peux compter sur l'organisation pour m'aider. |  |  |  |  |  |
| 24. أشعر أن رأيي يؤخذ بعين الاعتبار في المؤسَسة.  I feel that my opinion is accounted for in the organization.  Je sens que mon opinion est prise en compte dans l'organisation. |  |  |  |  |  |
| 25. أشعر أن الشركة تهتم بصدق بسلامتي ورفاهيتي.  I feel that the company sincerely cares for my well-being.  Je sens que l'entreprise se soucie sincèrement de mon bien-être. |  |  |  |  |  |
| Job Satisfaction |  |  |  |  |  |
| 26. أنا راضٍ عن طريقة إدارة مديري للفريق  I am satisfied with the way my manager runs the team.  Je suis satisfait de la manière dont mon manager dirige l'équipe. |  |  |  |  |  |
| 27. أنا راضٍ عن طريقة اتخاذ مديري للقرارات.  I am satisfied with how my manager makes decisions.  Je suis satisfait de la manière dont mon manager prend des décisions. |  |  |  |  |  |
| 28. أنا راضٍ عن كيفية تنفيذ سياسات وإجراءات الشركة.  I am satisfied with the way the company’s policies and procedures are implemented.  Je suis satisfait de la manière dont les politiques et procédures de l'entreprise sont mises en œuvre. |  |  |  |  |  |
| 29. أنا راضٍ عن راتبي مقارنة بعبء العمل.  I am satisfied with my remuneration compared to the workload.  Je suis satisfait de ma rémunération par rapport à la charge de travail. |  |  |  |  |  |
| 30. أنا راضٍ عن شعور الإنجاز الذي أحصل عليه من العمل.  I am satisfied with the sense of accomplishment I get from the job.  Je suis satisfait du sentiment d'accomplissement que je retire de mon travail. |  |  |  |  |  |
| Footnote: Items used to measure the dependent and independent variables of the study are presented in this table. | | | | | |
